# Supplementary material
Source: PubMed Central journal article supplement (PMC7262967)
Supplement: NIHMS1586153-supplement-1.pdf [file NIHMS1586153-supplement-1.pdf]

341 **CLASS V. SUPPLEMENTAL DESCRIPTORS**

342 **Table 7.** Summary table of data in RPSITE\_SB\_parasites\_data.csv. Intestinal parasites from  
 343 intestines of 182 raccoons in Santa Barbara County, California. Nematode counts include all  
 344 individuals larger than 1 mm. Prevalence is given with Bayesian confidence intervals calculated  
 345 using the “prevalence” package in R (Devleesschauwer et al., 2014; R Core Team, 2016).  
 346 †Includes infections that could not be identified to genus.

| Parasite                           | Number (Prevalence, Lower, Upper CI) | Intensity range |
|------------------------------------|--------------------------------------|-----------------|
| Nematodes                          | 168 (92.3, 87.8, 95.5)               |                 |
| <i>Baylisascaris procyonis</i>     | 166 (91.2, 86.4, 94.7)               | 1-2666          |
| <i>Physaloptera rara</i>           | 45 (24.7, 18.9, 31.4)                | 1-45            |
| Trematodes†                        | 53 (29.1, 22.9, 36)                  |                 |
| <i>Ascocotyle</i>                  | 5 (2.7, 1.1, 5.9)                    | 1-100+          |
| <i>Brachylaima</i>                 | 6 (3.3, 1.4, 6.7)                    | 1-7             |
| <i>Fibricola</i>                   | 27 (14.8, 10.2, 20.5)                | 1-100+          |
| <i>Maritrema</i>                   | 20 (11.0, 7.1, 16.1)                 | 1-100+          |
| <i>Microphallus</i>                | 1 (0.5, 0.1, 2.5)                    | 1               |
| <i>Pygidiopsis plana</i>           | 13 (7.1, 4.1, 11.6)                  | 1-100+          |
| Cestodes†                          | 53 (29.1, 22.9, 36)                  |                 |
| <i>Atriotaenia procyonis</i>       | 35 (19.2, 14, 25.4)                  | 1-100+          |
| <i>Mesocestoides variabilis</i>    | 5 (2.7 1.1, 5.9)                     | 1-100+          |
| Acanthocephala†                    | 62 (34.1, 27.5, 41.2)                |                 |
| <i>Profilicollis altmani</i>       | 38 (20.9, 15.5, 27.2)                | 1-48            |
| <i>Southwellina hispida</i>        | 22 (12.1, 8, 17.4)                   | 1-60            |
| <i>Plagiorhynchus cylindraceus</i> | 5 (2.7, 1.1, 5.9)                    | 1               |
